# Supplementary material
Source: PubMed Central journal article supplement (PMC7137356)
Supplement: NIHMS1577408-supplement-Supporting_Information.pdf [file NIHMS1577408-supplement-Supporting_Information.pdf]

## Supporting Information

### Supplementary Figure Legend

**Supplementary Figure 1.** (A) Percentages and (B) total counts of endogenous conventional T cells and NK cells are unchanged in the lymph nodes between control and exercised mice at four days post-transplantation. CON = control, EX = exercise, No STx = no skin transplantation, STx = skin transplantation from male B6 mouse. n=2 control non-transplanted mice, n=3 exercise non-transplanted mice, n=8 control transplanted mice, n=8 exercise transplanted mice. Each point represents a single mouse. Results are displayed as mean  $\pm$  SEM. Comparisons were performed using a two-tailed unpaired t test. Results were combined from 2 independent experiments.

**Supplementary Figure 2. Exercise does not reduce proliferation of conventional cells or reduce alloimmune T cell responses in an immunization model.** (A) Control or exercised B6 mice were immunized I.V. with 2W1S-Ova<sup>+</sup> B6 female splenocytes. Spleens from the recipient female mice were harvested one week later, and leukocytes were isolated. (B) Percentages of NK cells among leukocytes isolated from the spleen. (C) Percentages and (D) total counts of 2W1S:I-A<sup>b</sup> tetramer-staining cells among CD4<sup>+</sup> T cells, isolated from the spleen. (E) Total CD44<sup>hi</sup> and (F) Ki67<sup>+</sup>, CD44<sup>hi</sup> 2W1S:I-A<sup>b</sup> tetramer-staining CD4<sup>+</sup> T cells, isolated from the spleen. (B-F) No DST = no immunization, DST = immunization by 2W1S-Ova<sup>+</sup> splenocyte transfusion. Each point represents a single mouse. Results are displayed as mean  $\pm$  SEM. Comparisons were performed using a two-tailed unpaired t test.

**Supplementary Figure 3.** (A) Percentages and (B) total counts of endogenous conventional T cells are unchanged in the lymph nodes and in the skin allograft between control and exercised mice at ten days post-transplantation. CON = control, EX = exercise, No STx = no skin transplantation, STx = skin transplantation from male B6 mouse, LN = draining lymph nodes, SK = skin allograft. n=2 control non-transplanted mice, n=2 exercise non-transplanted mice, n=6 control transplanted mice, n=6 exercise transplanted mice. Each point represents a single mouse. Results are displayed as mean  $\pm$  SEM. Comparisons were performed using a two-tailed unpaired t test. Results were combined from 2 independent experiments.
