# Supplementary material
Source: PubMed Central journal article supplement (PMC7137356)

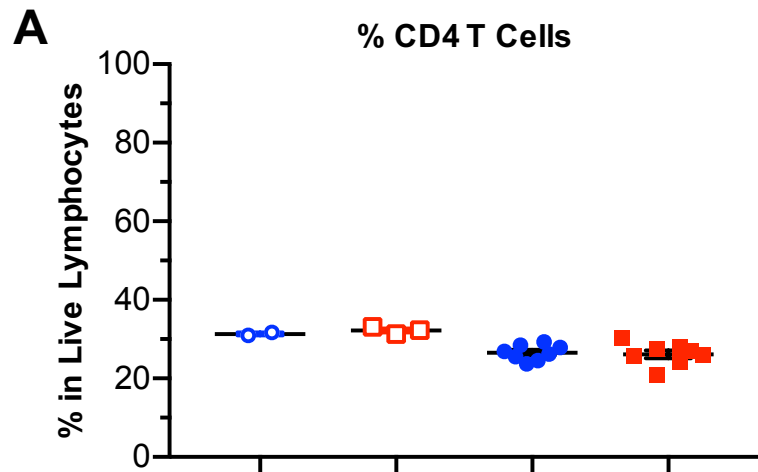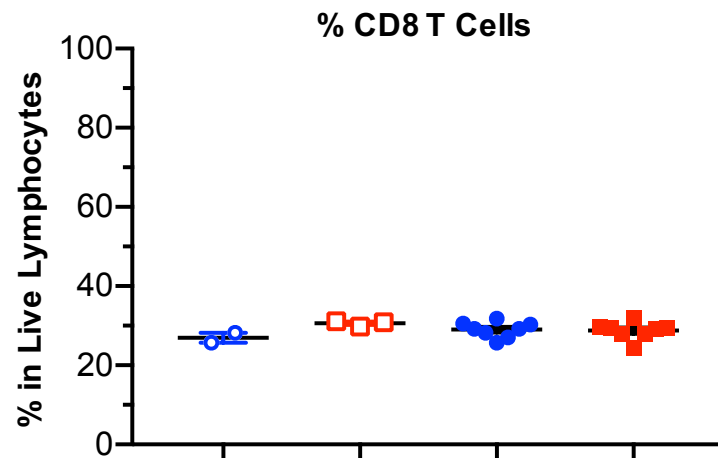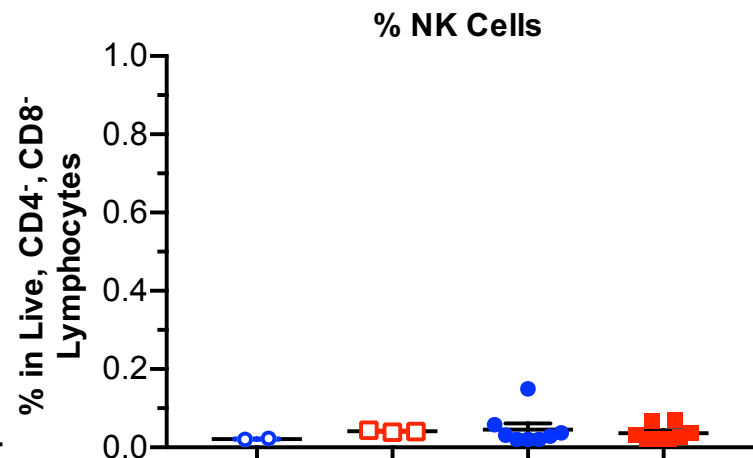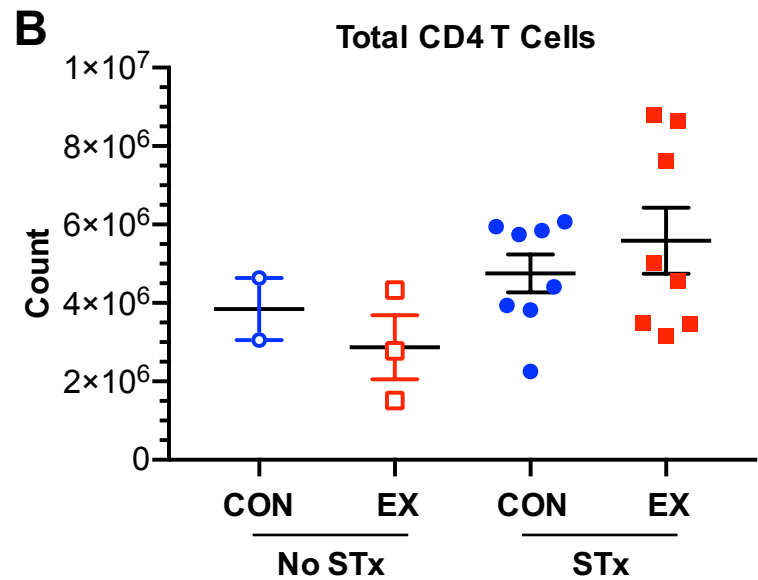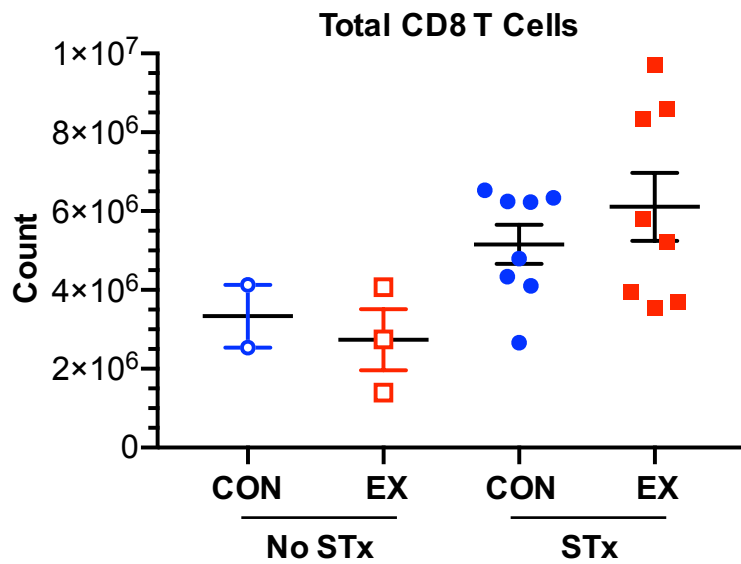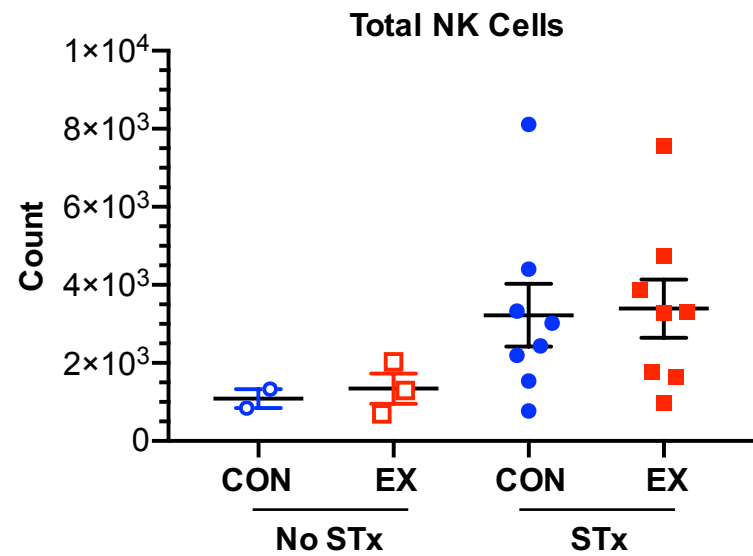

Supplement: NIHMS1577408-supplement-Sup_Fig_1.pdf [file NIHMS1577408-supplement-Sup_Fig_1.pdf]

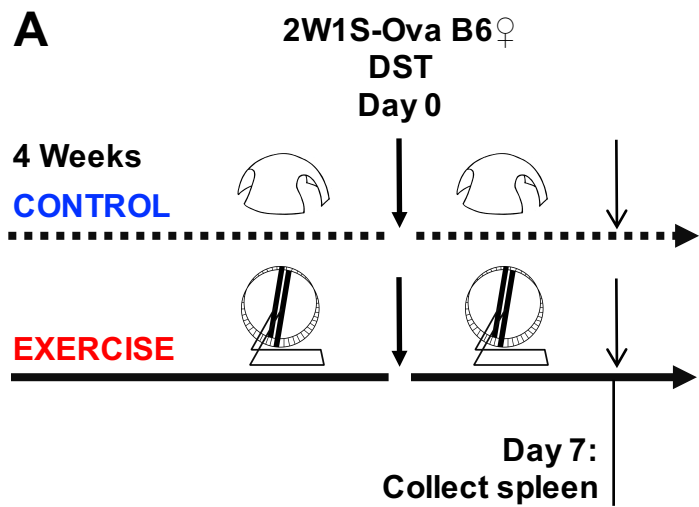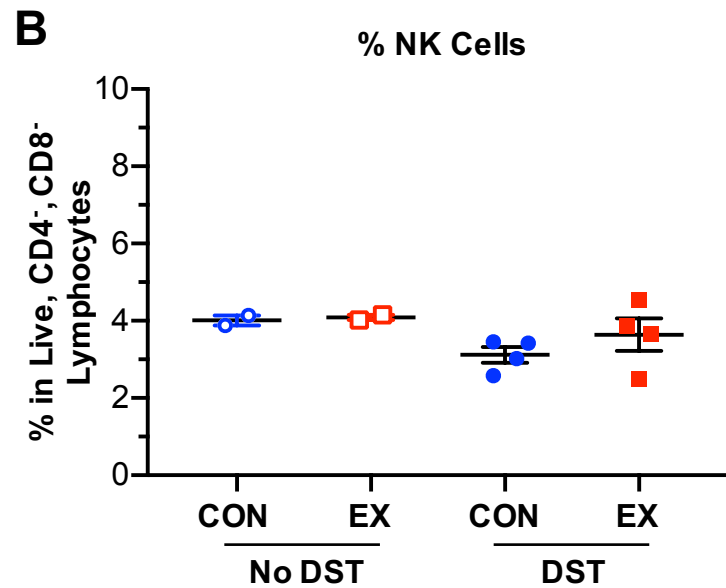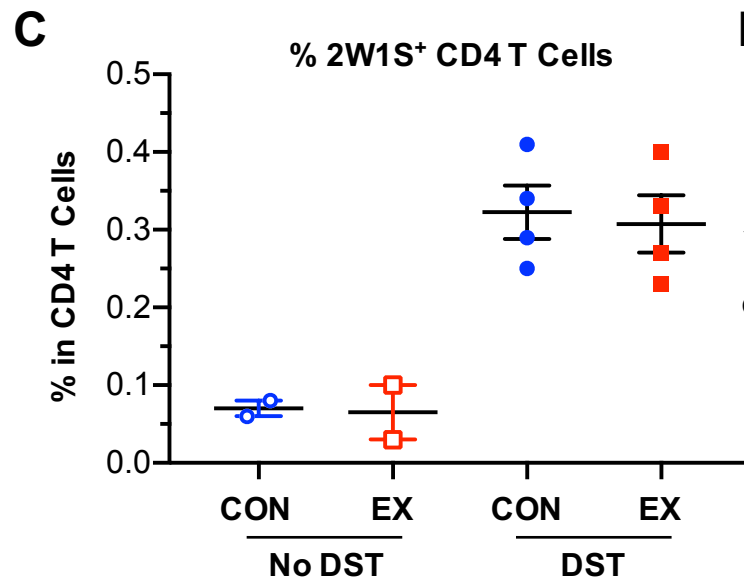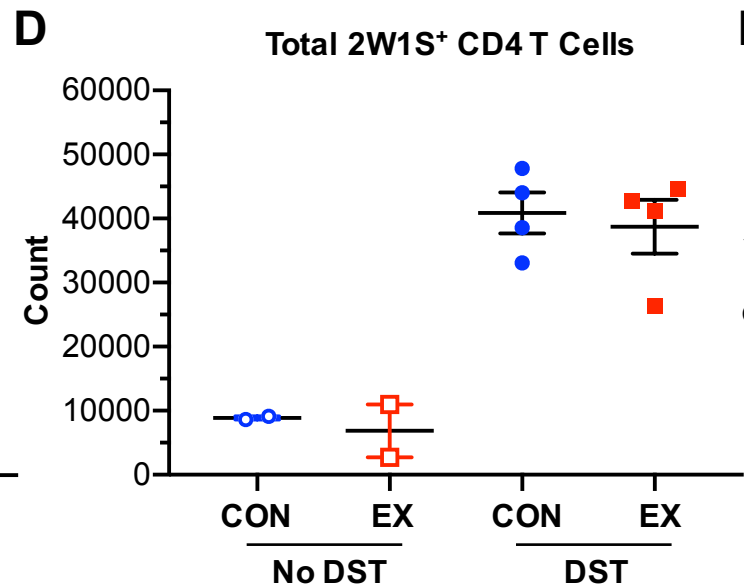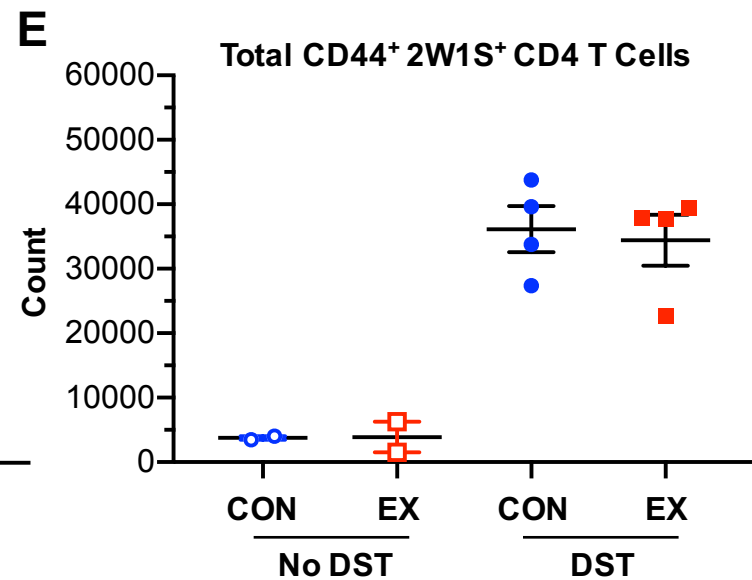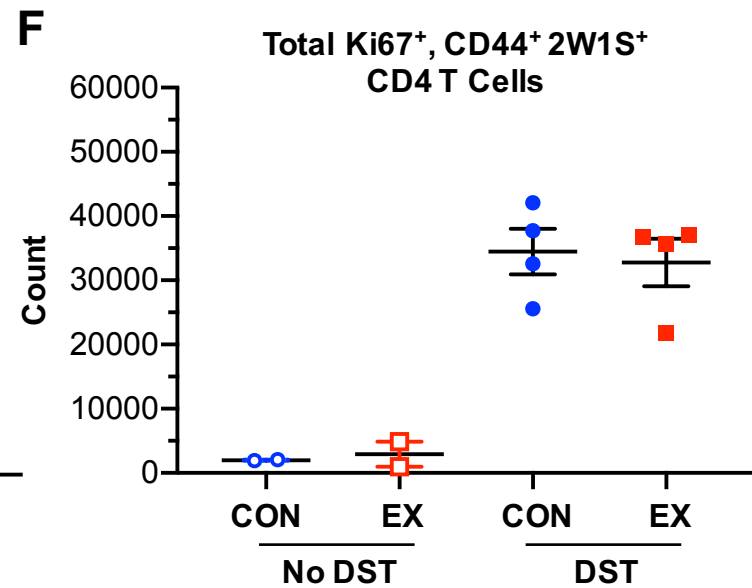

Supplement: NIHMS1577408-supplement-Sup_Fig_2.pdf [file NIHMS1577408-supplement-Sup_Fig_2.pdf]

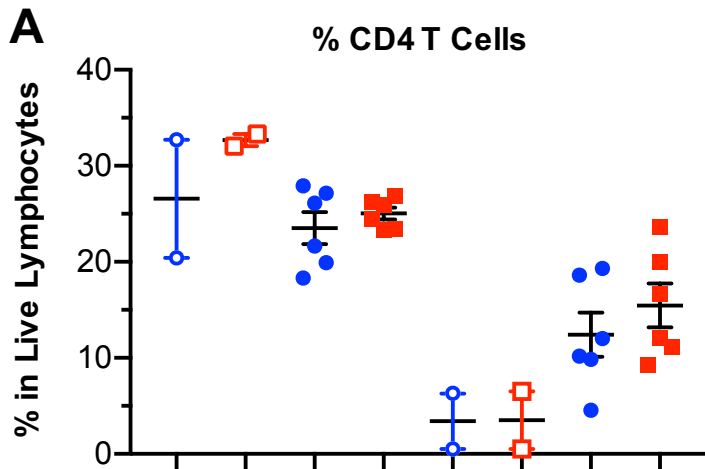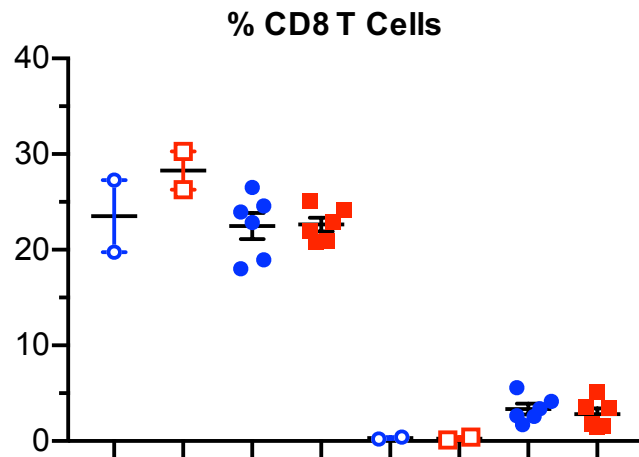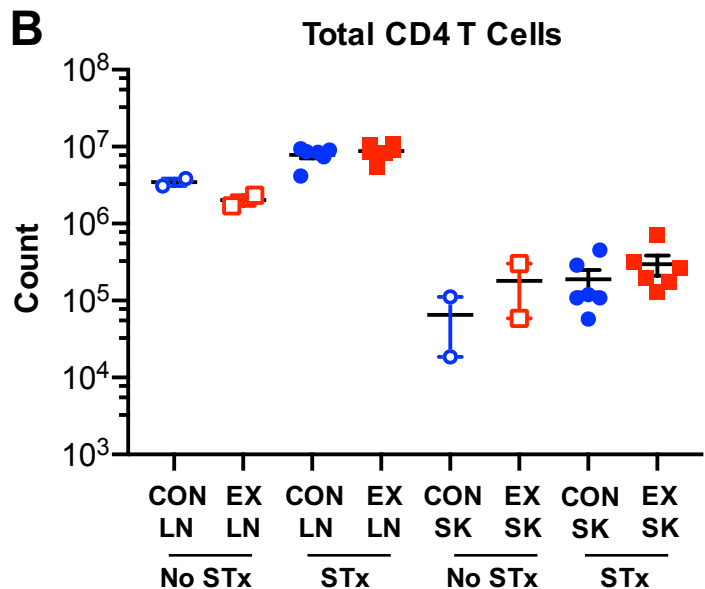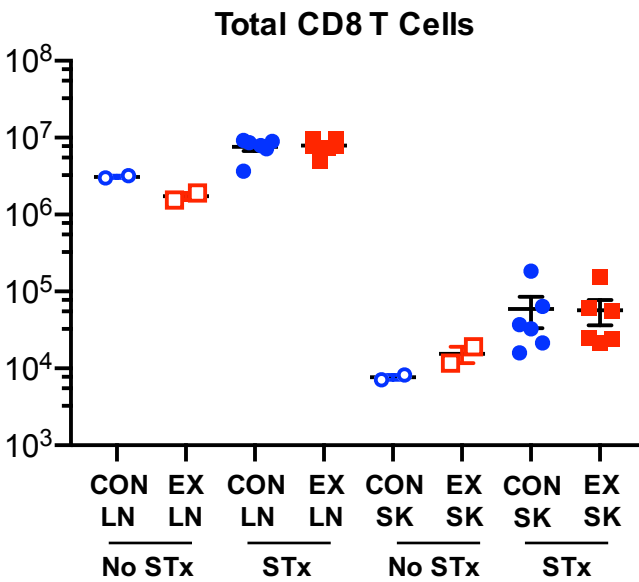

Supplement: NIHMS1577408-supplement-Sup_Fig_3.pdf [file NIHMS1577408-supplement-Sup_Fig_3.pdf]
